# Supplementary material for: A niclosamide–tobramycin hybrid adjuvant potentiates cefiderocol againstP. aeruginosa
Source: Royal Society of Chemistry journal article supplement (doi:10.1039/d1md00206f), 2021-01-01
Supplement: d1md00206f1.pdf [file d1md00206f1.pdf]

## Supplementary information

### **A Niclosamide-Tobramycin hybrid adjuvant potentiates cefiderocol against *P. aeruginosa***

Liam Berry<sup>a</sup>, Marc Brizuela<sup>a</sup>, Gregory Jackson<sup>a</sup>, Frank Schweizer<sup>a,b\*</sup>

<sup>a</sup> Department of Chemistry, University of Manitoba, Winnipeg, MB, Canada

<sup>b</sup> Department of Medical Microbiology and Infectious Diseases, University of Manitoba, Winnipeg, MB, Canada

#### **Contents**

|                                                                    |     |
|--------------------------------------------------------------------|-----|
| NMR spectra of compound 7                                          | S1  |
| Extended biological data                                           | S7  |
| Susceptibility profiles of MDR/XDR Gram-negative clinical isolates | S18 |

## NMR spectra

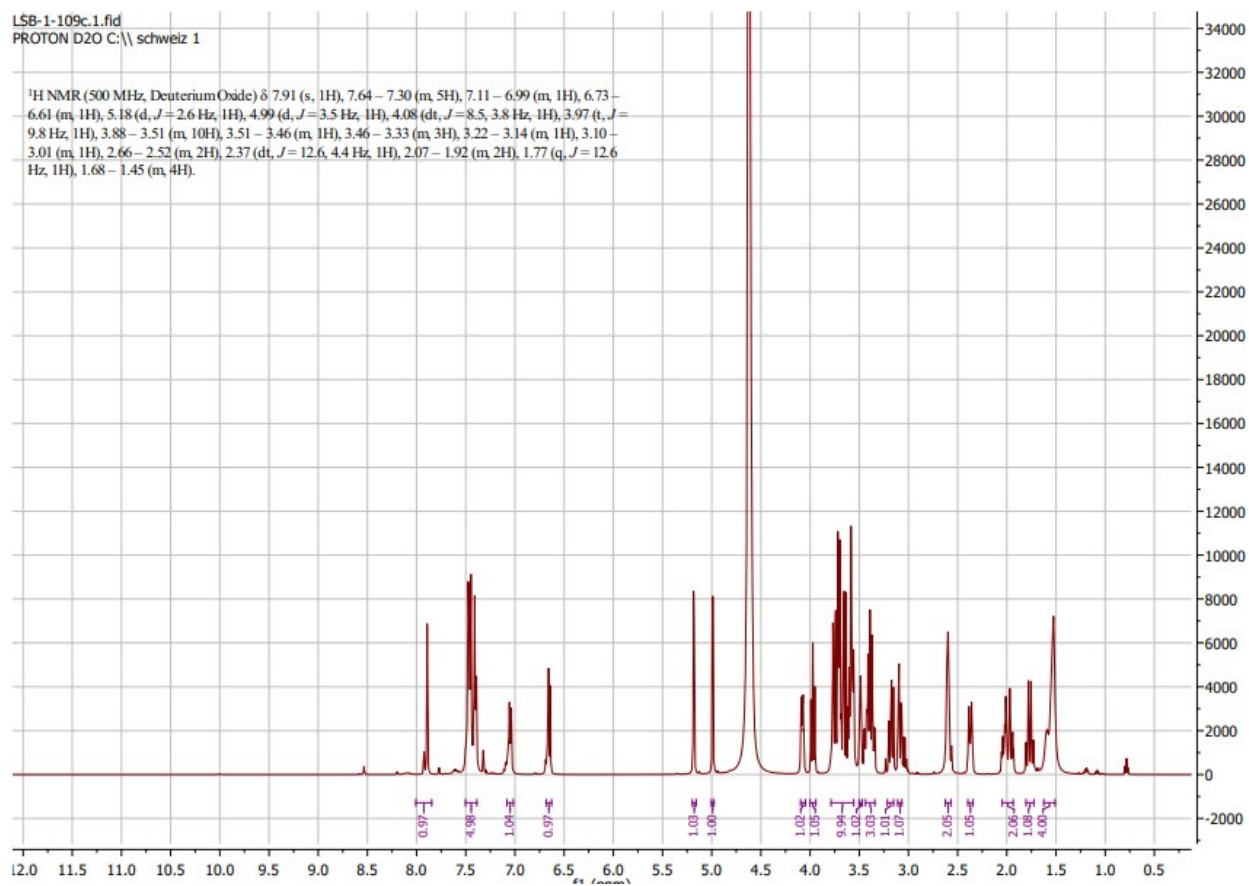

Figure S1. Hybrid 7  $^1\text{H}$  NMR spectrum

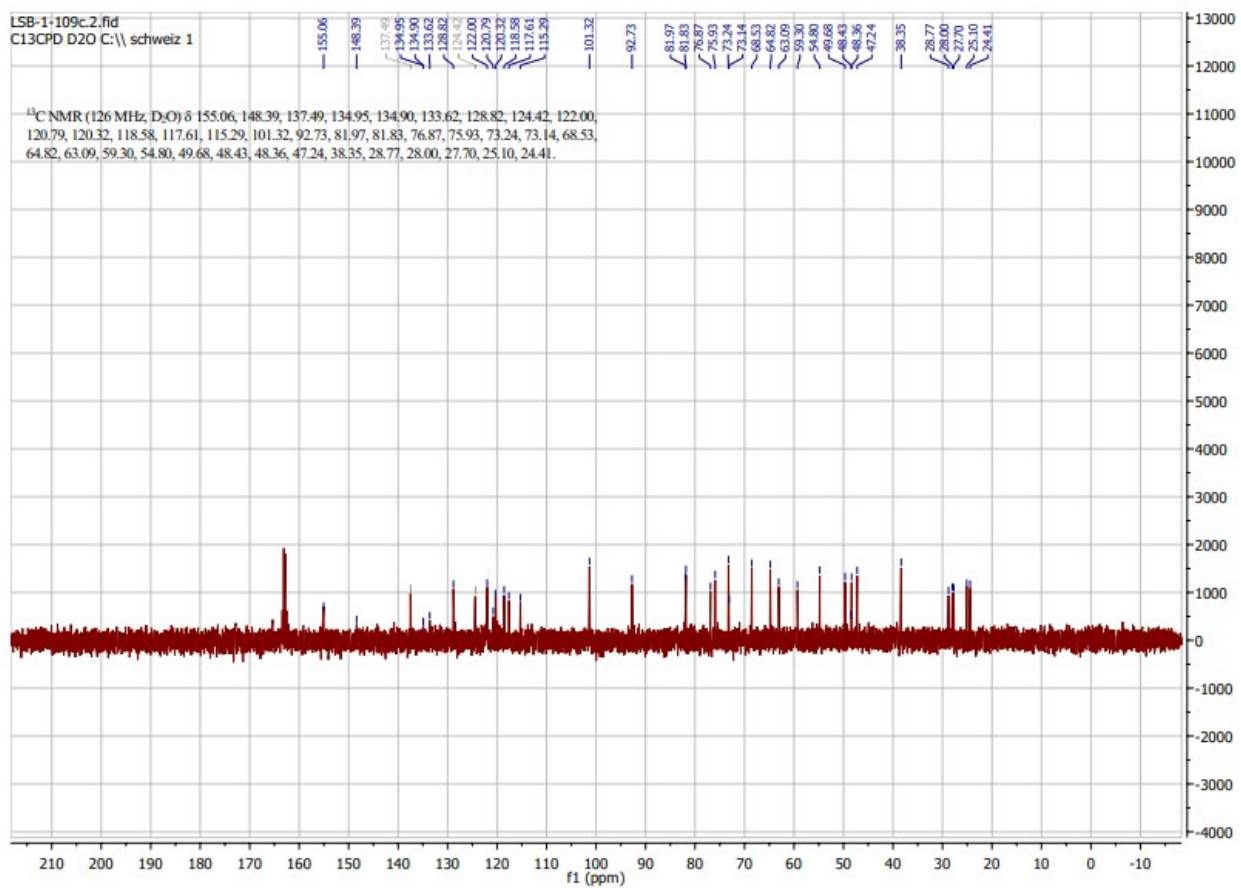

Figure S2. Hybrid 7 <sup>13</sup>C NMR spectrum

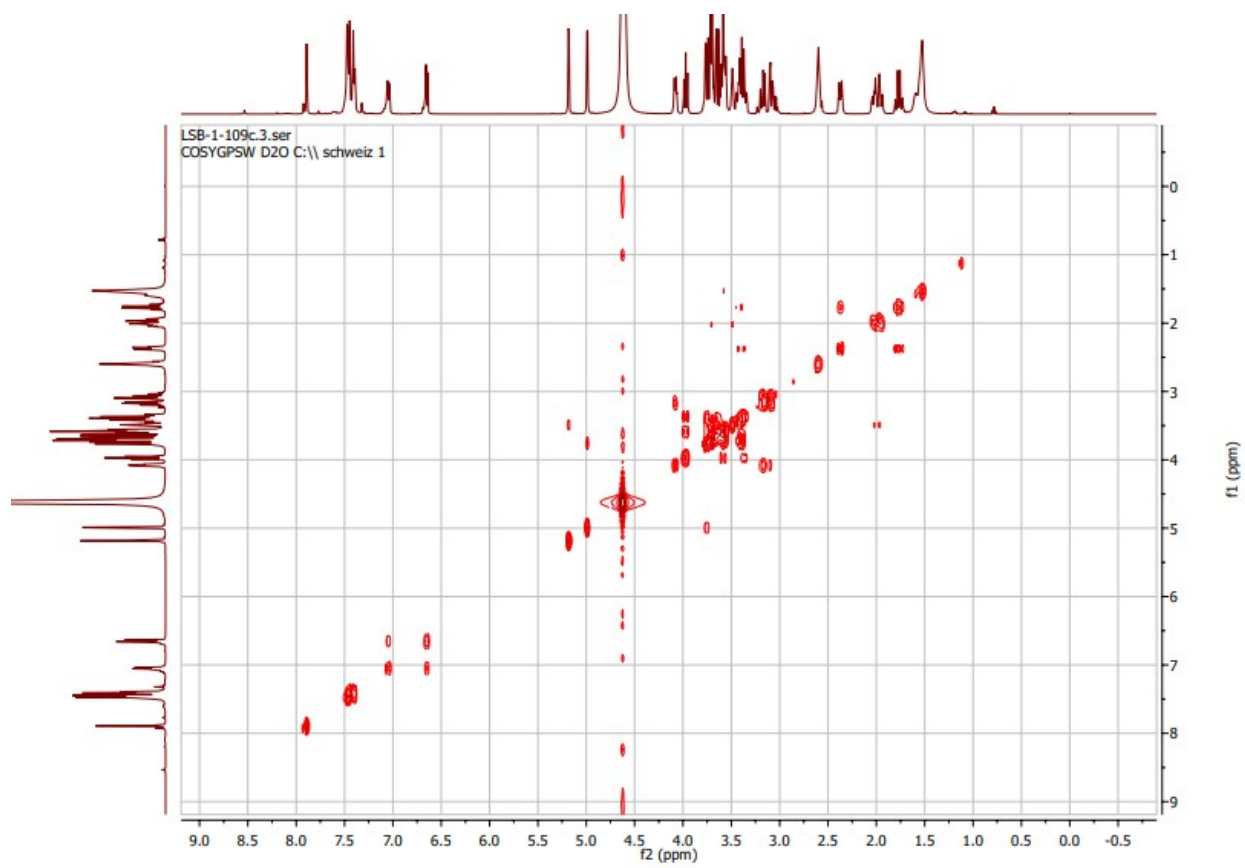

**Figure S3.** Hybrid 7 COSY NMR spectrum

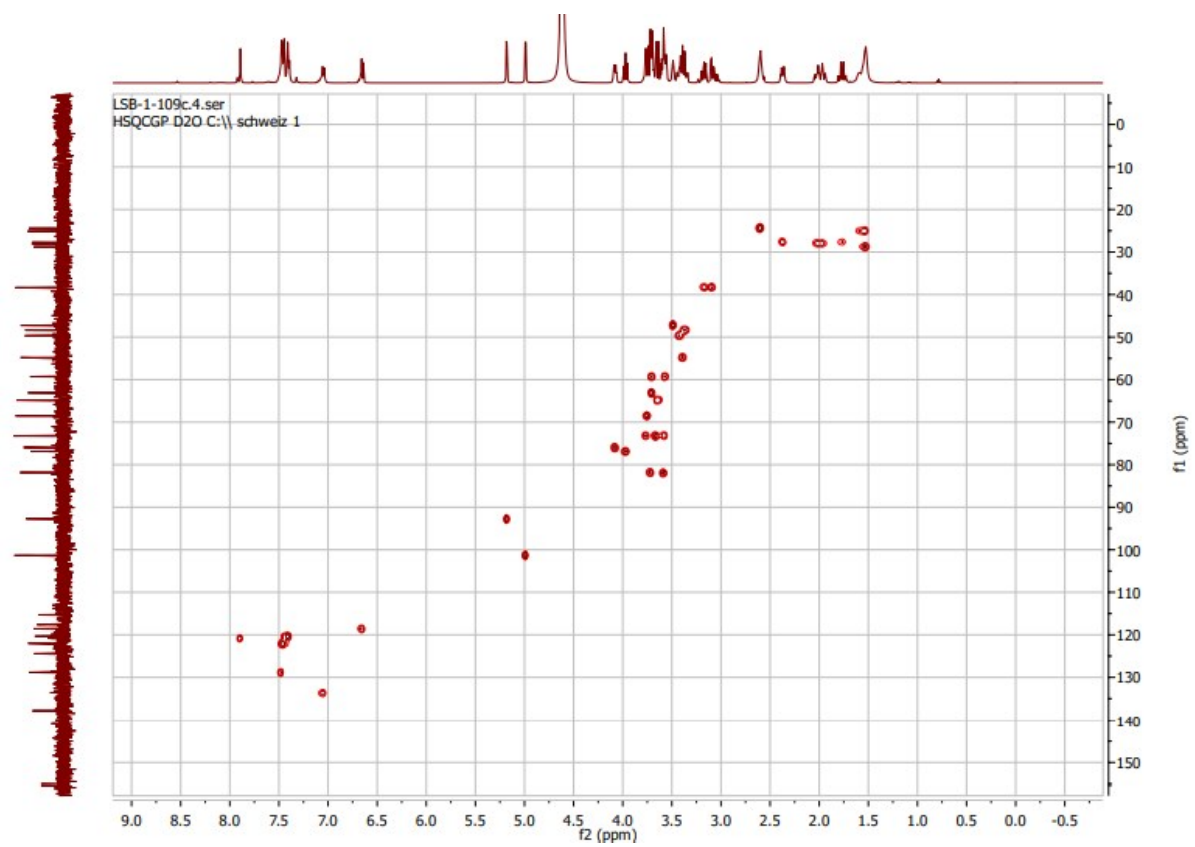

Figure S4. Hybrid 7 HSQC NMR spectrum

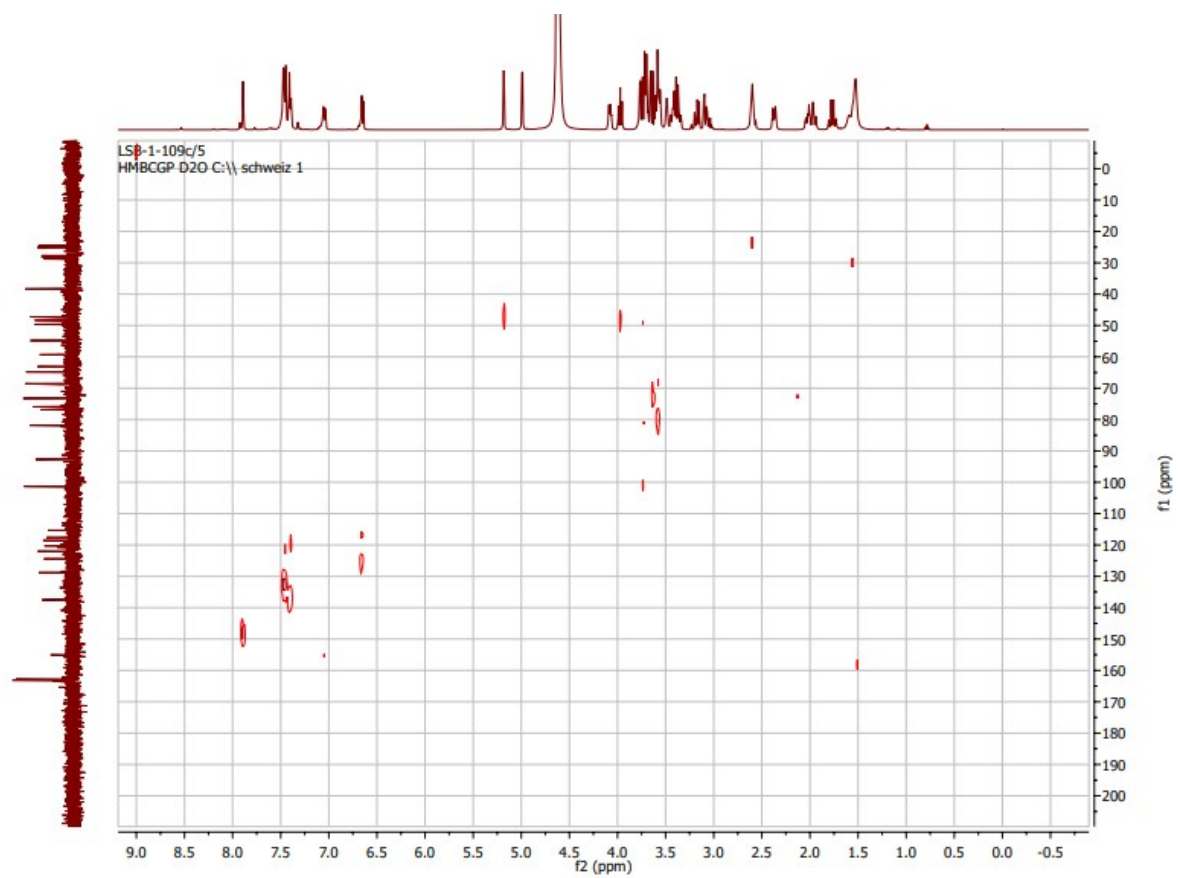

Figure S5. Hybrid 7 HMBC NMR spectrum

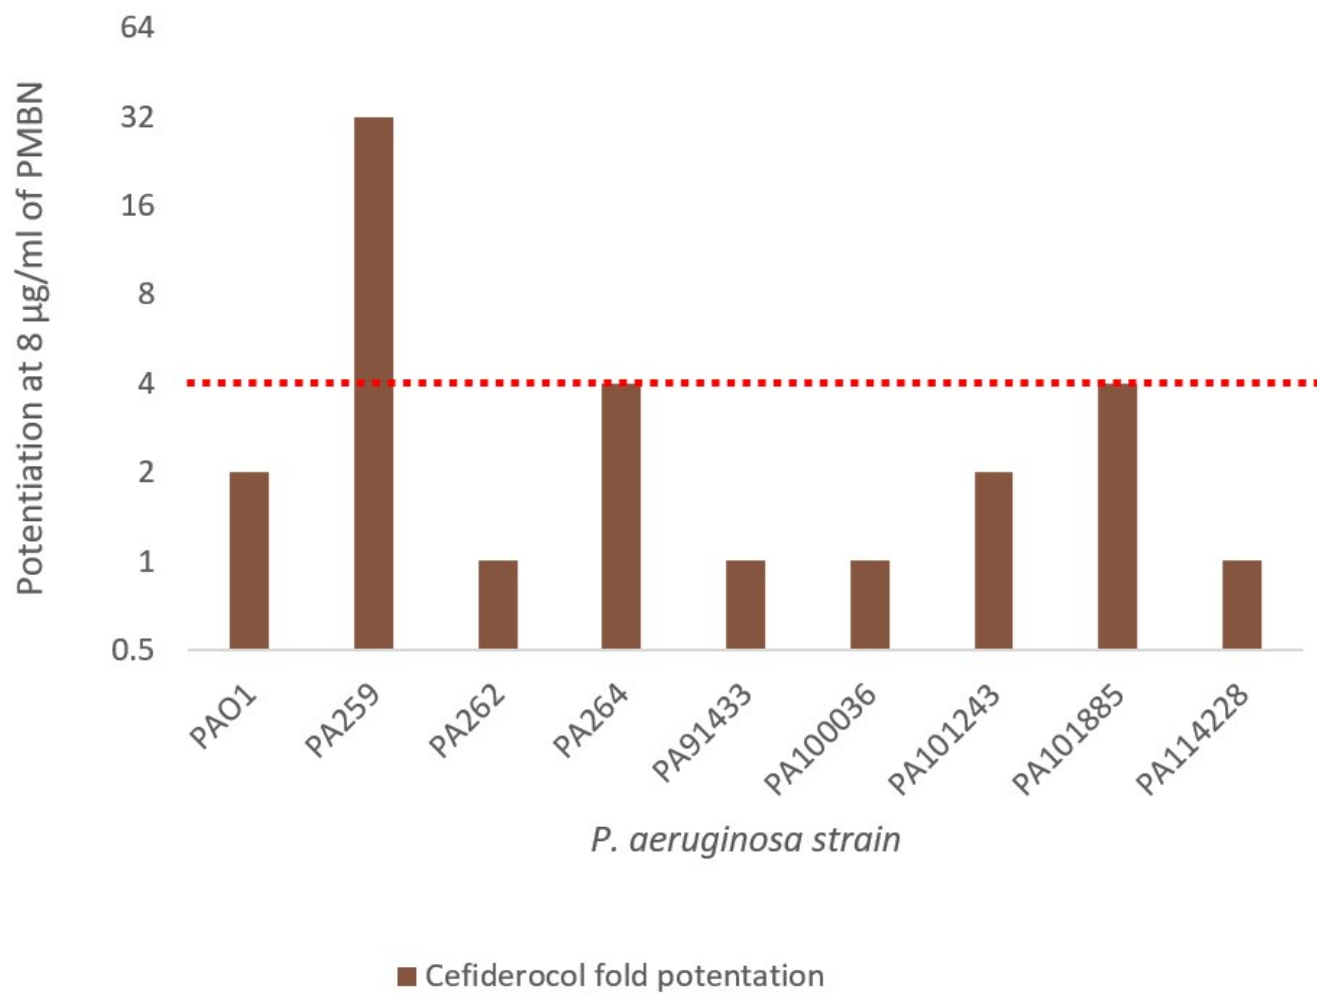

**Figure S6.** Fold potentiation of cefiderocol in combination with 8 µg/ml PMBN against wild-type and MDR clinical isolates of *P. aeruginosa* in MHB. Red dotted line denotes a 4-fold potentiation. MIC of PMBN was higher than 128 mg/mL for all strains.

## Biological Data

**Table S1.** Activity of niclosamide and niclosamide-azide analog (**3**) against Gram-negative and Gram-positive bacteria

| Strain                         | Minimum Inhibitory Concentration ( $\mu\text{g/ml}$ ) |          |
|--------------------------------|-------------------------------------------------------|----------|
|                                | Niclosamide                                           | <b>3</b> |
| PAO1                           | 512                                                   | >256     |
| <i>A. baumannii</i> ATCC 17978 | 512                                                   | >256     |
| <i>E. coli</i> ATCC 25922      | 1024                                                  | >256     |
| <i>S. aureus</i> ATCC 29213    | 1                                                     | 2        |
| MRSA ATCC 33592                | $\leq 0.25$                                           | 1        |
| MRSE 61589                     | $\leq 0.25$                                           | 0.5      |
| <i>E. faecalis</i> ATCC 29212  | 2                                                     | 64       |
| <i>E. faecium</i> ATCC 27270   | 2                                                     | 16       |



**Table S2.** Checkerboard studies of colistin and **3** against wild-type *P. aeruginosa* PAO1 and colistin-resistant clinical isolates

| Strain                         | MIC <sub>Colistin</sub> | MIC <sub>Combi</sub> | MIC <sub>3</sub> | MIC <sub>Combi</sub> | FIC index     | Interpretation |
|--------------------------------|-------------------------|----------------------|------------------|----------------------|---------------|----------------|
| PAO1                           | 1                       | 0.125                | >256             | 1                    | 0.063<x<0.067 | Synergy        |
| PA91433                        | 16                      | 0.25                 | >256             | 1                    | 0.016<x<0.019 | Synergy        |
|                                |                         |                      |                  |                      |               |                |
| <i>K. pneumoniae</i><br>113250 | 256                     | 0.25                 | >256             | 2                    | 0.002<x<0.010 | Synergy        |
| <i>K. pneumoniae</i><br>113254 | 256                     | 0.5                  | >256             | 1                    | 0.002<x<0.006 | Synergy        |
|                                |                         |                      |                  |                      |               |                |
| <i>E. coli</i><br>94393        | 4                       | 0.015625             | >256             | 4                    | 0.004<x<0.020 | Synergy        |
| <i>E. coli</i><br>94474        | 16                      | 0.25                 | >256             | 2                    | 0.016<x<0.018 | Synergy        |

**Table S3.** Potentiation of antibiotics with adjuvant 7 against *P. aeruginosa* PAO1 in MHB

| Drug            | MIC <sub>Drug</sub> | MIC at 8 µg/ml of 7 | Potentiation at 8 µg/ml of 7 |
|-----------------|---------------------|---------------------|------------------------------|
| Moxifloxacin    | 1                   | 0.25                | 4                            |
| Ciprofloxacin   | 0.25                | 0.125               | 2                            |
| Vancomycin      | 256                 | 64                  | 4                            |
| Tobramycin      | 2                   | 2                   | 1                            |
| Colistin        | 1                   | 1                   | 1                            |
| Niclosamide     | 512                 | 0.5                 | 1024                         |
| Piperacillin    | 8                   | 4                   | 2                            |
| Cefotaxime      | 16                  | 8                   | 2                            |
| Ceftazidime     | 4                   | 1                   | 4                            |
| Cefiderocol     | 0.125               | 0.0313              | 4                            |
| Ceftolozane     | 0.5                 | 0.125               | 4                            |
| Aztreonam       | 4                   | 0.5                 | 8                            |
| Minocycline     | 16                  | 2                   | 8                            |
| Doxycycline     | 8                   | 1                   | 8                            |
| Rifampicin      | 16                  | 1                   | 16                           |
| Chloramphenicol | 32                  | 2                   | 16                           |
| Erythromycin    | 256                 | 16                  | 16                           |
| Novobiocin      | 1024                | 16                  | 64                           |

|                  |      |           |    |
|------------------|------|-----------|----|
| Fosfomycin       | 64   | 32        | 2  |
| Linezolid        | 1024 | 64        | 16 |
| Clindamycin      | 1024 | 256       | 64 |
| Pleuromutilin    | 512  | 128       | 4  |
| Trimethoprim     | 128  | 16        | 4  |
| Sulfamethoxazole | 256  | 64        | 4  |
| Cotrimoxazole    | 2:38 | 0.25:4.75 | 4  |

**Table S4.** Potentiation of antibiotics with adjuvant **7** against *A. baumannii* ATCC 17978 in MHB

| Drug          | MIC <sub>Drug</sub> | MIC at 8 µg/ml of <b>7</b> | Potentiation at 8 µg/ml of <b>7</b> |
|---------------|---------------------|----------------------------|-------------------------------------|
| Moxifloxacin  | 0.0313              | 0.033                      | 1                                   |
| Ciprofloxacin | 1                   | 1                          | 1                                   |
| Vancomycin    | 128                 | 128                        | 1                                   |
| Tobramycin    | 1                   | 1                          | 1                                   |
| Colistin      | 0.5                 | 0.5                        | 1                                   |
| Niclosamide   | 512                 | 2                          | 256                                 |
| Piperacillin  | 64                  | 64                         | 1                                   |
| Cefotaxime    | 16                  | 16                         | 1                                   |
| Ceftazidime   | 4                   | 1                          | 4                                   |
| Cefiderocol   | 1                   | 0.5                        | 2                                   |

|                  |        |        |   |
|------------------|--------|--------|---|
| Ceftolozane      | 2      | 2      | 1 |
| Aztreonam        | 64     | 32     | 2 |
| Minocycline      | 0.25   | 0.25   | 1 |
| Doxycycline      | 0.125  | 0.125  | 1 |
| Rifampicin       | 2      | 1      | 2 |
| Chloramphenicol  | 128    | 64     | 2 |
| Erythromycin     | 16     | 8      | 2 |
| Novobiocin       | 8      | 2      | 4 |
| Fosfomicin       | 128    | 128    | 1 |
| Linezolid        | 256    | 128    | 2 |
| Clindamycin      | 512    | 256    | 2 |
| Pleuromutilin    | 1024   | 128    | 8 |
| Trimethoprim     | 64     | 64     | 1 |
| Sulfamethoxazole | >608   | >608   | 1 |
| Cotrimoxazole    | 32:608 | 32:608 | 1 |

**Table S5.** Potentiation of antibiotics with adjuvant **7** against *E. coli* ATCC 25922 in MHB

| Drug            | MIC <sub>Drug</sub> | MIC at 8 µg/ml of <b>7</b> | Potentiation at 8 µg/ml of <b>7</b> |
|-----------------|---------------------|----------------------------|-------------------------------------|
| Moxifloxacin    | 0.016               | 0.008                      | 2                                   |
| Ciprofloxacin   | 0.016               | 0.004                      | 4                                   |
| Vancomycin      | 128                 | 16                         | 8                                   |
| Tobramycin      | 2                   | 1                          | 2                                   |
| Colistin        | 0.25                | 0.125                      | 2                                   |
| Niclosamide     | 512                 | 1                          | 512                                 |
| Piperacillin    | 2                   | 0.25                       | 8                                   |
| Cefotaxime      | 0.25                | 0.0313                     | 8                                   |
| Ceftazidime     | 0.25                | 0.063                      | 4                                   |
| Cefiderocol     | 0.125               | 0.063                      | 2                                   |
| Ceftolozane     | 1                   | 0.5                        | 2                                   |
| Aztreonam       | 0.25                | 0.063                      | 4                                   |
| Minocycline     | 1                   | 0.25                       | 4                                   |
| Doxycycline     | 0.5                 | 0.25                       | 2                                   |
| Rifampicin      | 4                   | 0.031                      | 128                                 |
| Chloramphenicol | 4                   | 1                          | 4                                   |
| Erythromycin    | 32                  | 1                          | 32                                  |
| Novobiocin      | 32                  | 0.5                        | 64                                  |

|                  |       |         |     |
|------------------|-------|---------|-----|
| Fosfomicin       | 16    | 16      | 1   |
| Linezolid        | 128   | 32      | 4   |
| Clindamycin      | 64    | 4       | 16  |
| Pleuromutilin    | 64    | 8       | 8   |
| Trimethoprim     | 256   | 1       | 256 |
| Sulfamethoxazole | 304   | 76      | 4   |
| Cotrimoxazole    | 8:152 | 0.5:9.5 | 16  |

**Table S6.** Neither niclosamide nor tobramycin alone potentiate cefiderocol against wild-type *P. aeruginosa* PAO1 in MHB

| Drug <sub>1</sub> | MIC <sub>Drug1</sub> | MIC <sub>Combi</sub> | Drug <sub>2</sub> | MIC <sub>Drug2</sub> | MIC <sub>Combi</sub> | FIC index     |
|-------------------|----------------------|----------------------|-------------------|----------------------|----------------------|---------------|
| Cefiderocol       | 0.125                | 0.125                | Tobramycin        | 1                    | 0.5                  | 1.5           |
| Cefiderocol       | 0.125                | 0.125                | Niclosamide       | 512                  | 0.25                 | 1.031<x<1.063 |

**Table S7.** Checkerboard studies of cefotaxime and **7** against wild-type and multidrug-resistant *P. aeruginosa* strains in MHB

| Strain | MIC <sub>Drug</sub> | MIC <sub>Combi</sub> | MIC <sub>Adjuvant</sub> | MIC <sub>Combi</sub> | FIC index           |
|--------|---------------------|----------------------|-------------------------|----------------------|---------------------|
| PAO1   | 16                  | 4                    | 64                      | 16                   | 0.5                 |
| PA259  | 2048                | 1024                 | >128                    | 1                    | $0.5 < x < 0.508$   |
| PA260  | 1024                | 128                  | >128                    | 8                    | $0.125 < x < 0.188$ |
| PA264  | 2048                | 1024                 | >128                    | 16                   | $0.5 < x < 0.625$   |

**Table S8.** Checkerboard studies of ceftazidime and **7** against wild-type and multidrug-resistant *P. aeruginosa* strains in MHB

| Strain | MIC <sub>Drug</sub> | MIC <sub>Combi</sub> | MIC <sub>Adjuvant</sub> | MIC <sub>Combi</sub> | FIC index          |
|--------|---------------------|----------------------|-------------------------|----------------------|--------------------|
| PAO1   | 4                   | 0.5                  | 64                      | 16                   | 0.375              |
| PA259  | 512                 | 256                  | >128                    | 0.25                 | $0.5 < x < 0.502$  |
| PA260  | 64                  | 16                   | >128                    | 8                    | $0.25 < x < 0.313$ |
| PA264  | 128                 | 32                   | >128                    | 2                    | $0.25 < x < 0.266$ |

**Table S9.** Checkerboard studies of ceftolozane and **7** against wild-type and multidrug-resistant *P. aeruginosa* strains in MHB. ND = Not determined

| Strain | MIC <sub>Drug</sub> | MIC <sub>Combi</sub> | MIC <sub>Adjuvant</sub> | MIC <sub>Combi</sub> | FIC index   |
|--------|---------------------|----------------------|-------------------------|----------------------|-------------|
| PAO1   | 0.5                 | 0.125                | 64                      | 1                    | 0.266       |
| PA259  | >16                 | ND                   | >128                    | ND                   | ND          |
| PA260  | 1                   | 0.5                  | >128                    | 16                   | 0.5<x<0.625 |
| PA264  | 2                   | 2                    | >128                    | 0.25                 | 1<x<1.002   |



**Table S10.** Checkerboard studies of cefiderocol and 7 against wild-type and multidrug-resistant *P. aeruginosa* strains in ID-CAMHB

| Strain | MIC <sub>Drug</sub> | MIC <sub>Combi</sub> | MIC <sub>Adjuvant</sub> | MIC <sub>Combi</sub> | FIC index   | Interpretation | Potential<br>at 8 µg/ml of<br>adjuvant |
|--------|---------------------|----------------------|-------------------------|----------------------|-------------|----------------|----------------------------------------|
| PAO1   | 0.0313              | 0.008                | 64                      | 2                    | 0.281       | Synergy        | 4                                      |
| PA259  | 4                   | 4                    | >128                    | 0.5                  | 1<x<1.002   | Additive       | 1                                      |
| PA260  | 0.063               | 0.063                | >128                    | 0.25                 | 1<x<1.002   | Additive       | 1                                      |
| PA262  | 0.0313              | 0.0156               | >128                    | 0.25                 | 0.5<x<0.502 | Additive       | 2                                      |
| PA264  | 0.0156              | 0.0156               | >128                    | 0.25                 | 1<x<1.002   | Additive       | 1                                      |

**Table S11.** MICs (in µg/mL) of various antibiotics against MDR clinical isolates.\*

a) *Pseudomonas aeruginosa* isolates

| <i>P. aeruginosa</i> | PTZ | A/C | AZT | FOX | CFZ  | CTR | CPM | CTX  | CAZ  | IMI | MER  | DOR   | ETP | CIP | LEV | MOX | TOB  | GEN | AMK | TGC | MIN | DOX  | ERC | OMC | CST | CAM  |
|----------------------|-----|-----|-----|-----|------|-----|-----|------|------|-----|------|-------|-----|-----|-----|-----|------|-----|-----|-----|-----|------|-----|-----|-----|------|
| 259-96918            | 64  | >32 | 32  | >32 | >128 | >64 | >64 | 2048 | 512  | 32  | 1024 | >1024 | >32 | >16 | 256 | >16 | 256  | >32 | >64 | 32  | 32  | 32   | 8   | 64  | 1   | 1024 |
| 262-101856           | 64  | >32 | 32  | >32 | >128 | 64  | 32  | 128  | 16   | 32  | 32   | 16    | >32 | >16 | 64  | >16 | 1024 | >32 | >64 | 32  | 64  | 1024 | 8   | 64  | 1   | 2048 |
| 264-104354           | 256 | >32 | 64  | >32 | >128 | >64 | 32  | 2048 | 128  | 32  | 64   | 16    | >32 | >16 | 64  | >16 | 128  | >32 | 8   | 32  | 32  | 64   | 8   | 64  | 1   | 4096 |
| 91433                | 64  | >32 | 512 | >32 | >128 | >64 | 16  | 1024 | 1024 | 32  | 16   | 16    | >32 | 2   | ND  | 16  | 16   | 32  | >32 | 32  | 16  | 32   | 16  | 128 | 4   | 8    |
| 114228               | ND  | ND  | >32 | ND  | ND   | ND  | ND  | 128  | 8    | ND  | 8    | 8     | ND  | ND  | ND  | ND  | 2    | ND  | ND  | ND  | 32  | 16   | 8   | 16  | 4   | ND   |

b) *Acinetobacter baumannii* isolates

| <i>A. baumannii</i> | PTZ | FOX | CFZ  | CPM  | CTX  | CAZ | C/T | IMI  | MER | CIP   | LEV  | MOX  | TOB | GEN  | AMK | TGC  | MIN   | DOX | ERC  | OMC | CST   | CAM |
|---------------------|-----|-----|------|------|------|-----|-----|------|-----|-------|------|------|-----|------|-----|------|-------|-----|------|-----|-------|-----|
| AB027               | 512 | ND  | >128 | >128 | >256 | ND  | >16 | 32   | 16  | >16   | 8    | 8    | ND  | 32   | >64 | 4    | 0.25  | ND  | 0.5  | 1   | 0.25  | 128 |
| AB031               | 4   | ND  | >128 | 4    | 16   | ND  | >16 | 0.25 | 1   | 0.25  | 0.25 | 0.12 | ND  | <0.5 | 2   | 8    | 0.25  | ND  | 0.25 | 2   | 0.25  | 128 |
| LAC-4               | ND  | ND  | ND   | ND   | 8    | >16 | 8   | <1   | <1  | >4    | 2    | ND   | >4  | >4   | 4   | <4   | 4     | <4  | 0.06 | 1   | 0.125 | 32  |
| 92247               | <1  | 32  | 128  | 4    | ND   | ND  | 2   | ND   | 4   | ≤0.06 | ND   | ND   | ND  | ND   | <1  | 0.25 | 0.125 | ND  | ND   | ND  | 4     | ND  |

c) *Escherichia coli* isolates

| <i>E. coli</i>  | PTZ  | A/C | AZT   | FOX | CFZ  | CPM   | CAZ   | C/T  | IMI  | MER   | ETP   | CIP | LEV | MOX | TOB  | GEN  | AMK | TGC  | MIN | DOX | ERC   | OMC | CST | CAM |
|-----------------|------|-----|-------|-----|------|-------|-------|------|------|-------|-------|-----|-----|-----|------|------|-----|------|-----|-----|-------|-----|-----|-----|
| 94393 (mcr-1 +) | ≤1   | 4   | ≤0.12 | 4   | 1    | ≤0.25 | ≤0.25 | 0.25 | 0.25 | ≤0.03 | ≤0.03 | 0.5 | 1   | 1   | ≤0.5 | ≤0.5 | 2   | 0.25 | 2   | 4   | 0.5   | 4   | 4   | 4   |
| 94474 (mcr-1 +) | 16   | >32 | ≤0.12 | 16  | 4    | ≤0.25 | 0.5   | 0.5  | 0.25 | ≤0.03 | ≤0.03 | >16 | 32  | 16  | 32   | 16   | 2   | 1    | 64  | >32 | 1     | 16  | 16  | 4   |
| 107115          | >512 | >32 | >64   | >32 | >128 | >64   | >32   | >6   | 8    | 32    | >32   | >16 | 32  | 16  | 8    | >32  | 2   | 0.25 | 32  | >32 | 0.125 | 4   | 0.5 | 512 |

d) *Klebsiella pneumoniae* isolates

| <i>K. pneumoniae</i> | PTZ | A/C | AZT   | FOX | CFZ  | CPM | CAZ  | C/T | IMI  | MER   | ETP   | CIP   | LEV    | MOX   | TOB  | GEN  | AMK | TGC | MIN | DOX | ERC | OMC | CST | CAM  |
|----------------------|-----|-----|-------|-----|------|-----|------|-----|------|-------|-------|-------|--------|-------|------|------|-----|-----|-----|-----|-----|-----|-----|------|
| 113250               | 4   | 4   | ≤0.12 | 1   | 1    | 1   | 0.5  | 2   | 0.25 | ≤0.03 | ≤0.03 | ≤0.06 | 0.125  | ≤0.06 | ≤0.5 | ≤0.5 | ≤1  | ND  | 2   | 2   | 1   | 2   | >16 | 4    |
| 113254               | <1  | 2   | ≤0.12 | 1   | 1    | 1   | ≤0.2 | 0.5 | 0.12 | ≤0.03 | ≤0.03 | ≤0.06 | 0.0625 | ≤0.06 | ≤0.5 | ≤0.5 | ≤1  | ND  | 2   | 2   | 0.5 | 4   | >16 | 2    |
| 116381               | 8   | 16  | 16    | 16  | >128 | 16  | 8    | 1   | 0.5  | <0.03 | 0.12  | >16   | 128    | >16   | 4    | ≤0.5 | ≤1  | 1   | 64  | >32 | 0.5 | 4   | 0.5 | >512 |

e) *E. cloacae* isolates

| <i>E. cloacae</i> | PTZ | A/C | AZT   | FOX | CFZ  | CPM   | CAZ | C/T  | IMI  | MER   | ETP   | CIP   | MOX   | TOB | GEN  | AMK | TGC | MIN | DOX | ERC | OMC | CST  | CAM |
|-------------------|-----|-----|-------|-----|------|-------|-----|------|------|-------|-------|-------|-------|-----|------|-----|-----|-----|-----|-----|-----|------|-----|
| 117029            | 2   | 16  | ≤0.12 | >32 | >128 | ≤0.25 | 0.5 | 0.25 | 0.25 | ≤0.03 | ≤0.03 | ≤0.06 | ≤0.06 | 2   | ≤0.5 | 2   | 0.5 | 32  | >32 | 0.5 | 4   | 0.25 | 8   |
| 118564            | 2   | >32 | ≤0.12 | >32 | >128 | 0.25  | 0.5 | ND   | ND   | 0.12  | ND    | 0.06  | 0.12  | 1   | 1    | 2   | ND  | ND  | 4   | ND  | ND  | >16  | ND  |
| 121187            | 1   | 8   | ≤0.12 | >32 | 32   | 0.25  | 0.5 | ND   | ND   | 0.06  | ND    | 0.25  | 1     | 32  | >32  | 1   | ND  | ND  | >32 | ND  | ND  | >16  | ND  |

\* Complete susceptibility data was not available for all isolates used. PTZ: piperacillin-tazobactam, A/C: amoxicillin-clavulanic acid, AZT: aztreonam, FOX: ceftiofloxacin, CFZ: cefazolin, CTR: ceftriaxone, CPM: ceftazidime, CTX: cefotaxime, CAZ: ceftazidime, C/T: ceftolozane-tazobactam, IMI: imipenem, MER: meropenem, DOR: doripenem, ETP: ertapenem, CIP: ciprofloxacin, LEV: levofloxacin, MOX: moxifloxacin, TOB: tobramycin, GEN: gentamicin, AMK: amikacin, TGC: tigecycline, MIN: minocycline, DOX: doxycycline, ERC: eravacycline, OMC: omadacycline, CST: colistin, CAM: chloramphenicol, ND: not determined.
